# Supplementary material for: A prognostic model based on immune-related long noncoding RNAs for patients with epithelial ovarian cancer
Source: J Ovarian Res. 2022 Jan 15;15:8. doi: 10.1186/s13048-021-00930-w (PMC8760785; doi:10.1186/s13048-021-00930-w)
Supplement: Supplementary file 2 — Additional file 2. Supplementary Table S2: A list of 421 differentially expressed immune-related lncRNAs. [file 13048_2021_930_MOESM2_ESM.xlsx]

## Sheet: Sheet1
A list of 421 differentially expressed immune‐related lncRNAs
lncRNA	immuneGene	cor	pvalue	Regulation
KRT7-AS	PLXNB1	0.514735	5.00317e-27	postive
AC010531.6	LRP1	-0.477034	6.2151e-23	negative
FGD5-AS1	RAF1	0.63846	8.71724e-45	postive
SNHG12	GNRH1	0.481607	2.10623e-23	postive
AC012146.1	CD81	-0.434509	6.94175e-19	negative
AC091563.1	PGR	0.415039	3.26045e-17	postive
AC010615.2	RAC2	-0.40035	5.06478e-16	negative
AC005332.6	GRB2	0.537501	9.29864e-30	postive
AC130371.2	LTBP4	0.406175	1.73446e-16	postive
SNHG9	SEM1	0.431038	1.40461e-18	postive
AC011477.3	HCST	-0.491624	1.85784e-24	negative
AL137802.2	NOD1	-0.415555	2.9541e-17	negative
AC004771.3	SEM1	-0.422369	7.88105e-18	negative
AC099850.3	BIRC5	0.522481	6.2118e-28	postive
LINC01816	BCL3	-0.417671	1.96623e-17	negative
AC005288.1	BECN1	0.631586	1.38909e-43	postive
AC106782.2	PPP4C	0.479834	3.21055e-23	postive
AL391152.1	CIITA	-0.41321	4.62227e-17	negative
AC010894.2	NOD1	-0.482579	1.66981e-23	negative
AL162586.1	PLXNB1	0.623809	2.93025e-42	postive
AL035413.1	HCST	-0.459178	3.65133e-21	negative
NIFK-AS1	LYN	-0.421827	8.76468e-18	negative
AC024575.1	TYK2	0.435366	5.82611e-19	postive
AC023043.1	LRP1	-0.408877	1.04768e-16	negative
SNHG8	UBXN1	0.401872	3.83568e-16	postive
AC092171.2	RAC1	0.559991	1.14502e-32	postive
AC020915.2	PLXNB1	0.439296	2.59233e-19	postive
AL049840.4	PLXNB1	0.48065	2.64512e-23	postive
LINC02593	IL11RA	0.430918	1.43902e-18	postive
LINC02482	SP1	-0.402907	3.1723e-16	negative
AC024896.1	KRAS	0.479175	3.75265e-23	postive
AC026356.2	SP1	0.404251	2.47708e-16	postive
AC022509.3	SP1	0.400741	4.71631e-16	postive
FOXP4-AS1	VAV1	-0.412871	4.92989e-17	negative
AC103769.1	ILK	-0.527464	1.5772e-28	negative
AC131097.3	PLXNB1	0.402205	3.60873e-16	postive
LINC00174	PLXNB1	0.532706	3.638e-29	postive
PRKAG2-AS1	F2R	-0.400675	4.7733e-16	negative
AC091153.3	LRP1	-0.486673	6.23061e-24	negative
TP53TG1	SEM1	0.512629	8.74317e-27	postive
LINC02544	EDNRA	0.637676	1.19937e-44	postive
AL513008.1	PLXNB1	0.477109	6.10629e-23	postive
USP30-AS1	CXCL11	0.729339	4.00063e-64	postive
CCDC18-AS1	PLXNB1	0.472858	1.64658e-22	postive
AC006042.1	PLXNB1	0.46426	1.17361e-21	postive
AC124319.1	TAPBP	0.62349	3.31486e-42	postive
AC011465.1	PLXNB1	0.420964	1.03746e-17	postive
AC138207.5	TYROBP	0.764674	6.10062e-74	postive
TMEM147-AS1	PLXNB1	0.444218	9.26049e-20	postive
AC020907.4	PLXNB1	0.485313	8.65693e-24	postive
PRKCZ-AS1	PLXNB1	0.445419	7.18473e-20	postive
AC002128.1	PLXNB1	0.439905	2.28422e-19	postive
AC018653.3	MC1R	0.478335	4.5762e-23	postive
AC108449.2	SEM1	-0.532495	3.86139e-29	negative
AC139795.2	PLXNB1	0.486316	6.79328e-24	postive
MIR4435-2HG	CCL11	0.466814	6.58593e-22	postive
AC127024.5	PLXNB1	0.420459	1.14476e-17	postive
AC026979.2	NOD1	-0.458916	3.86968e-21	negative
AC019069.1	BCL3	-0.448906	3.4203e-20	negative
AL080317.1	ILK	-0.469063	3.9448e-22	negative
AP001266.2	GNRH1	0.438086	3.33e-19	postive
AC010422.2	TYK2	0.466039	7.85199e-22	postive
AC011446.1	ILK	-0.402053	3.71063e-16	negative
AL359921.2	ILK	-0.433337	8.81428e-19	negative
AC139887.2	FGFRL1	0.494118	1.00229e-24	postive
HLA-DQB1-AS1	HLA-DQB1	0.861274	6.81979e-113	postive
AC080013.6	ILK	-0.458731	4.03124e-21	negative
AC138932.5	PLXNB1	0.437472	3.77985e-19	postive
ANKRD10-IT1	DDX17	0.542159	2.41924e-30	postive
SNHG11	CYLD	-0.463244	1.47472e-21	negative
AC107308.1	CD74	-0.501542	1.54925e-25	negative
AC092747.4	KRAS	0.507579	3.28105e-26	postive
AC012640.2	SP1	-0.435886	5.23739e-19	negative
AC020765.2	PPP4C	0.449846	2.79562e-20	postive
MIR200CHG	LRP1	-0.422771	7.28298e-18	negative
AL031600.1	PLXNB1	0.535307	1.7405e-29	postive
AC245060.5	ILK	-0.530167	7.4272e-29	negative
AC011445.1	AKT2	0.562695	4.9418e-33	postive
AC010326.3	IRF3	0.423342	6.51035e-18	postive
AL096828.3	ADRM1	0.436695	4.4354e-19	postive
SNHG19	BECN1	-0.452408	1.60875e-20	negative
AC092718.4	BIRC5	0.414993	3.28935e-17	postive
AC092279.1	PLXNB1	0.400978	4.51686e-16	postive
AC007406.5	NCK2	0.444589	8.56335e-20	postive
AC025575.2	CD74	-0.406857	1.52806e-16	negative
LINC01063	NMB	0.417247	2.1335e-17	postive
AC007849.1	ILK	-0.438732	2.91334e-19	negative
AC080112.1	GRN	0.428814	2.19647e-18	postive
AL357033.4	SECTM1	0.421858	8.71136e-18	postive
AC026471.4	ILK	-0.420606	1.11242e-17	negative
LINC02004	SEM1	0.423933	5.79468e-18	postive
TRAM2-AS1	HSP90AB1	0.426039	3.8206e-18	postive
AL355803.1	MC1R	0.405468	1.97757e-16	postive
PCED1B-AS1	CD48	0.849352	1.1572e-106	postive
MIR202HG	PROK1	0.671937	4.16507e-51	postive
AC080038.1	LRP1	0.69477	6.45849e-56	postive
AC004923.4	PLXNB1	0.505753	5.2638e-26	postive
AL118511.1	BCL3	-0.437329	3.893e-19	negative
AC107057.1	GBP2	-0.544163	1.34695e-30	negative
AC004816.1	ARG2	0.402551	3.38663e-16	postive
AC005884.2	HSPA5	-0.46375	1.31622e-21	negative
AL354892.2	BCL3	-0.468262	4.73694e-22	negative
LENG8-AS1	PLXNB1	0.424111	5.59523e-18	postive
AC024060.1	ILK	-0.439926	2.27401e-19	negative
MIRLET7BHG	PLXNB1	0.453186	1.3589e-20	postive
U62317.2	TYMP	0.453066	1.39479e-20	postive
AC025259.3	NR4A1	0.859383	7.24907e-112	postive
AC093635.1	NOD1	-0.450601	2.37657e-20	negative
AL117379.1	GNRH1	0.410711	7.4208e-17	postive
AC131532.1	BCL3	-0.440591	1.98033e-19	negative
GAS5	TPT1	0.534487	2.19767e-29	postive
AC004540.1	NDRG1	-0.483024	1.50118e-23	negative
AL513534.1	PLXNB1	0.453867	1.17199e-20	postive
ZNF528-AS1	PLCG1	0.427079	3.10654e-18	postive
AL591895.1	ILK	-0.407505	1.35402e-16	negative
AC145343.1	LRP1	-0.402762	3.25817e-16	negative
AC023510.2	KRAS	0.533121	3.23631e-29	postive
SH3PXD2A-AS1	S100A6	0.441285	1.71333e-19	postive
BAIAP2-DT	HSP90AB1	0.531234	5.5067e-29	postive
AC012313.1	MAVS	0.401186	4.3484e-16	postive
AP002807.1	UNC93B1	0.413211	4.62162e-17	postive
AC135050.6	NOD1	-0.422581	7.56055e-18	negative
RASSF8-AS1	KRAS	0.521811	7.45462e-28	postive
LINC00685	IRF9	0.422397	7.83854e-18	postive
AL355472.1	CALR	-0.421699	8.98638e-18	negative
AC009120.3	PLXNB1	0.547667	4.79155e-31	postive
AC139887.4	FGFRL1	0.464304	1.16195e-21	postive
AC008443.5	LRP1	-0.432038	1.14743e-18	negative
AC107294.3	IL11RA	0.424811	4.87283e-18	postive
AC083880.1	PPP4C	0.420434	1.15048e-17	postive
KMT2E-AS1	LRP1	-0.426994	3.15975e-18	negative
AL645933.2	MICA	0.654108	1.21882e-47	postive
LINC01004	PLXNB1	0.404143	2.52676e-16	postive
AL023284.4	ILK	-0.507651	3.21995e-26	negative
AL139287.1	PLXNB1	0.518263	1.9474e-27	postive
AC073257.2	INHBB	0.418181	1.78157e-17	postive
AC068987.4	SEMA6C	0.514738	4.9997e-27	postive
SNHG6	BECN1	-0.403652	2.76608e-16	negative
AL035409.1	OXTR	0.405714	1.88949e-16	postive
AC104041.1	ITGB2	-0.418443	1.6934e-17	negative
AP006284.1	PLXNB1	0.516574	3.06373e-27	postive
MIR503HG	FYN	0.414889	3.35567e-17	postive
AL359513.1	NOD1	-0.413495	4.37795e-17	negative
AC005332.5	ILK	-0.447455	4.66233e-20	negative
AL035701.1	ITGB2	-0.423184	6.71535e-18	negative
LINC00265	PLCG1	0.581288	1.23444e-35	postive
AL161785.1	LCN2	0.465739	8.40362e-22	postive
AC008649.2	PLXNB1	0.444305	9.09241e-20	postive
AL031985.3	S100A6	-0.504085	8.08618e-26	negative
AC074212.1	PLXNB1	0.406571	1.61139e-16	postive
AC040169.1	SP1	-0.426558	3.4458e-18	negative
WNT5A-AS1	ENG	0.424669	5.011e-18	postive
ATP2A1-AS1	PPP4C	0.42122	9.86857e-18	postive
AC112491.1	HSPA5	-0.447085	5.04481e-20	negative
AC074117.1	HSP90AB1	0.456831	6.12911e-21	postive
AC008764.2	HCST	-0.474555	1.10993e-22	negative
AL356311.1	ESR1	0.522215	6.67922e-28	postive
AC004466.3	PLXNB1	0.501717	1.48157e-25	postive
AC068580.1	PLXNA3	0.485141	9.02467e-24	postive
LINC01857	CD3D	0.694312	8.14393e-56	postive
AC002044.1	ILK	-0.412808	4.9893e-17	negative
MEIS1-AS3	FYN	0.422292	8.00097e-18	postive
LHX1-DT	FGF18	0.436715	4.4177e-19	postive
LOH12CR2	BCL3	-0.446962	5.17872e-20	negative
AC011445.2	NFKBIB	0.451216	2.08164e-20	postive
AC004130.1	PLCG1	-0.423694	6.07413e-18	negative
AC004148.2	PLXNB1	0.464487	1.11503e-21	postive
AL391834.1	GNRH1	0.408037	1.226e-16	postive
TNKS2-AS1	CTSS	-0.46576	8.36375e-22	negative
AC024075.2	NR2F6	0.506379	4.4777e-26	postive
DLG3-AS1	LRP1	-0.429272	2.00383e-18	negative
YTHDF3-AS1	SP1	-0.467175	6.06815e-22	negative
AL031186.1	PLCG1	0.413557	4.32739e-17	postive
AL139089.1	LYN	-0.472608	1.74461e-22	negative
AC084824.5	ILK	-0.466992	6.32516e-22	negative
ASMTL-AS1	IRF9	0.516209	3.37743e-27	postive
AP001628.1	PLXNB1	0.479351	3.59969e-23	postive
AC113346.1	SAA1	0.442441	1.34534e-19	postive
FGF14-AS2	BCL3	-0.403582	2.80197e-16	negative
AC103691.1	ILK	-0.483886	1.22087e-23	negative
AC007991.2	IDO1	0.775916	1.95629e-77	postive
AP003352.1	BECN1	-0.459413	3.46643e-21	negative
ERICH6-AS1	NOD1	-0.484989	9.36218e-24	negative
LINC01089	PLXNB1	0.483645	1.29336e-23	postive
AC010636.1	NR5A1	0.578602	3.00503e-35	postive
AL512306.2	IRF9	0.443336	1.11487e-19	postive
EPB41L4A-AS1	UBXN1	0.460968	2.4533e-21	postive
AF131215.5	PLXNB1	0.455576	8.07058e-21	postive
AC093752.3	PLXNB1	0.517296	2.52525e-27	postive
AP005205.2	SP1	-0.460154	2.94069e-21	negative
AC108673.3	ILK	-0.435715	5.42448e-19	negative
AL365330.1	PLXNB1	0.50036	2.09216e-25	postive
AC016205.1	BIRC5	0.429138	2.05851e-18	postive
LINC00342	PLXNB1	0.469385	3.66438e-22	postive
AL021707.6	IRF9	0.493523	1.16169e-24	postive
CTBP1-DT	FGFRL1	0.481848	1.98846e-23	postive
HCG14	LRP1	-0.434692	6.68735e-19	negative
AC005840.4	TAPBPL	0.447513	4.60518e-20	postive
AC025165.5	TYK2	0.413109	4.71196e-17	postive
MAFG-DT	CSF1	-0.401134	4.38971e-16	negative
AC087741.1	IRF9	0.477166	6.02623e-23	postive
MAGI2-AS3	VIM	0.495153	7.74694e-25	postive
SNHG10	LRP1	-0.40693	1.50722e-16	negative
AL135999.1	IRF9	0.661122	5.63098e-49	postive
AL122058.1	BMP7	0.761301	6.24471e-73	postive
AC015922.2	LRP1	0.440714	1.93039e-19	postive
AP000873.2	EED	0.460668	2.623e-21	postive
AC010319.4	NR2F6	0.557424	2.52496e-32	postive
AC079145.1	ITGB2	-0.403396	2.89959e-16	negative
AC084018.1	PLXNB1	0.584598	4.079e-36	postive
AC107375.1	PLXNB1	0.43354	8.45849e-19	postive
LINC01133	AQP9	0.435716	5.42323e-19	postive
ZFAS1	HSPA5	-0.481188	2.32727e-23	negative
LINC01614	PLAU	0.79535	5.56056e-84	postive
LINC02159	HTR3A	0.559073	1.52026e-32	postive
LINC01871	CD3D	0.850379	3.5341e-107	postive
AC124016.1	BECN1	-0.424597	5.08353e-18	negative
AC106897.1	TRAF3	-0.402605	3.35322e-16	negative
LINC00239	S100A6	0.526133	2.27951e-28	postive
LINC00284	SLPI	0.401258	4.29176e-16	postive
AC004918.1	GNRH1	0.427365	2.93426e-18	postive
LINC02100	PSMB8	0.441582	1.61031e-19	postive
AL133338.1	BCL3	-0.408612	1.10099e-16	negative
AC064836.3	CTSS	-0.464227	1.18237e-21	negative
AC093627.4	CXCL17	0.43395	7.78141e-19	postive
AC005393.1	PSMC4	0.460963	2.45619e-21	postive
SNHG4	BRD8	0.503134	1.03181e-25	postive
AL590369.1	LCN2	0.465989	7.94261e-22	postive
AC020916.1	NR4A1	0.533593	2.83178e-29	postive
AC019155.3	DEFB126	0.415969	2.72852e-17	postive
IDH1-AS1	SP1	-0.423141	6.77226e-18	negative
AP001029.1	PLXNB1	0.413862	4.08275e-17	postive
AC015813.1	PLXNB1	0.420882	1.05416e-17	postive
AC012306.2	TNFRSF14	-0.401635	4.00605e-16	negative
SH3BP5-AS1	PLXNB1	0.611989	2.56901e-40	postive
BX470102.1	S100A6	0.708799	4.2106e-59	postive
AC087289.1	BCL3	0.537841	8.43536e-30	postive
RAD51-AS1	PLXNB1	0.499303	2.73397e-25	postive
ZSCAN16-AS1	NOD1	-0.442634	1.29207e-19	negative
AC004888.1	LCN2	0.522741	5.78528e-28	postive
BACE1-AS	MSR1	-0.465247	9.39313e-22	negative
CD27-AS1	PTPN6	0.459281	3.56941e-21	postive
LINC02257	S100A6	0.411253	6.69918e-17	postive
AL049838.1	CIITA	-0.492539	1.48245e-24	negative
AC132872.1	ILK	-0.453584	1.24639e-20	negative
AL691482.3	NFKBIZ	0.570236	4.55341e-34	postive
AC096677.1	CSRP1	0.423268	6.60512e-18	postive
AC069120.1	FGFR1	0.526591	2.00834e-28	postive
LINC01918	SLC22A17	0.466227	7.52404e-22	postive
MIR222HG	LIF	0.460169	2.93079e-21	postive
HM13-IT1	MAVS	0.448665	3.60102e-20	postive
AL391069.2	NDRG1	-0.469787	3.34169e-22	negative
AC008735.2	IRF9	0.535077	1.85831e-29	postive
AC008608.2	LRP1	-0.444514	8.7002e-20	negative
MELTF-AS1	BECN1	-0.410243	8.10424e-17	negative
AC107294.2	IL11RA	0.422722	7.3536e-18	postive
MIR22HG	THBS1	0.573758	1.46355e-34	postive
AL359076.1	CXCL17	0.402225	3.5957e-16	postive
ZEB1-AS1	IL11RA	0.408131	1.20475e-16	postive
AL157392.4	IRF9	0.405281	2.04745e-16	postive
NEAT1	IRF9	0.469995	3.18616e-22	postive
SPINT1-AS1	PLCG1	-0.457859	4.88677e-21	negative
AC008760.1	GNRH1	0.477945	5.01612e-23	postive
LY6E-DT	IFIH1	0.442046	1.4613e-19	postive
AL355001.2	PPP4C	0.430319	1.62371e-18	postive
AC048341.2	GNRH1	0.463722	1.32448e-21	postive
AC104083.1	EDNRA	0.61914	1.75497e-41	postive
AC020928.2	CD74	-0.467367	5.80786e-22	negative
AP000759.1	TRAF3	0.453433	1.28804e-20	postive
AC074135.1	PLCG1	0.454585	1.00225e-20	postive
AL031665.2	NOD1	-0.422901	7.09998e-18	negative
AC002398.1	ILK	-0.412946	4.86064e-17	negative
AC060766.4	ILK	-0.433434	8.64334e-19	negative
AL023803.1	NOD1	-0.416886	2.28732e-17	negative
AC015922.3	IKBKG	-0.410234	8.11809e-17	negative
LINC00623	FGF18	0.40493	2.18477e-16	postive
PCAT6	CYBB	-0.446292	5.97135e-20	negative
AC068987.1	SECTM1	-0.423935	5.79279e-18	negative
AC004264.1	LIF	0.825764	8.57247e-96	postive
AC015912.3	LRP1	-0.526607	1.99956e-28	negative
AC027644.3	SEM1	0.46036	2.80867e-21	postive
AC069281.2	PLXNB1	0.50209	1.3475e-25	postive
AL121832.2	ADRM1	0.438383	3.13174e-19	postive
AC004540.2	NDRG1	-0.447949	4.19598e-20	negative
AL354836.1	ADRM1	0.45852	4.22397e-21	postive
DNM3OS	PDGFRA	0.692587	1.9464e-55	postive
AL392172.1	SEM1	0.422968	7.00716e-18	postive
AL390719.2	IRF9	0.463384	1.42904e-21	postive
AC024075.1	NR2F6	0.484811	9.77219e-24	postive
AL022323.1	CIITA	0.494029	1.02472e-24	postive
AC108010.1	PLXNB1	0.593291	2.09265e-37	postive
AC027796.4	PLXNB1	0.528452	1.19872e-28	postive
AL590652.1	FGFRL1	0.451899	1.79609e-20	postive
SMIM25	FCER1G	0.672733	2.87883e-51	postive
AL022322.1	LTB4R2	0.455073	9.00899e-21	postive
AC012645.3	LGR5	-0.432421	1.06175e-18	negative
TGFB2-AS1	SECTM1	-0.418254	1.75654e-17	negative
AP002748.3	LRP1	-0.409821	8.774e-17	negative
USP2-AS1	PLAU	-0.402844	3.20951e-16	negative
AC090559.1	CSF1R	0.847542	9.15761e-106	postive
LINC01503	S100A2	0.48726	5.40353e-24	postive
AL161729.4	MSR1	-0.436992	4.17235e-19	negative
AC079210.1	BCL3	0.472482	1.79632e-22	postive
AL109811.2	PLXNB1	0.466531	7.02418e-22	postive
AC129492.1	NR4A3	0.525839	2.47257e-28	postive
AL391121.1	LRP1	0.457043	5.84975e-21	postive
AC147067.1	RAC2	0.460494	2.7267e-21	postive
AL928654.2	PLXNB1	0.557259	2.65534e-32	postive
AC005515.1	CXCL11	0.664332	1.34105e-49	postive
PSMB8-AS1	PSMB8	0.863883	2.47127e-114	postive
AC010463.3	NR2F6	0.431266	1.3412e-18	postive
MIR100HG	TNFRSF19	0.446867	5.2841e-20	postive
AP001528.1	EED	0.546403	6.9664e-31	postive
AP002360.3	MSR1	-0.485276	8.73571e-24	negative
AL354993.2	S100A6	-0.41257	5.21975e-17	negative
LINC01786	PLXNB1	0.491983	1.70029e-24	postive
AL451165.2	SEM1	0.497346	4.47593e-25	postive
HCP5	TAP1	0.825206	1.4785e-95	postive
AC087623.1	FGFR1	0.691669	3.08746e-55	postive
AL445524.1	SEM1	0.536718	1.16373e-29	postive
LINC01143	CD74	-0.534331	2.29673e-29	negative
LINC00106	IRF9	0.495123	7.80621e-25	postive
LINC02014	LCN2	0.420664	1.10009e-17	postive
AL513477.2	ILK	-0.422832	7.1965e-18	negative
AC132872.3	PLXNB1	0.542015	2.52287e-30	postive
AC245060.2	PLXNB1	0.55591	4.01177e-32	postive
AC124319.2	IRF9	0.485721	7.8447e-24	postive
LINC01232	PSMB8	0.400778	4.68442e-16	postive
AC022007.1	IL17RC	0.430526	1.55712e-18	postive
EBLN3P	DDX58	0.440696	1.93746e-19	postive
AC113139.1	ILK	-0.406408	1.66117e-16	negative
URB1-AS1	NOD1	-0.413484	4.38786e-17	negative
AL731577.2	SEM1	-0.543921	1.44596e-30	negative
AC022509.2	S100A1	0.494653	8.77366e-25	postive
AC125807.2	NCK2	0.446001	6.35183e-20	postive
PTOV1-AS2	IRF9	0.553608	8.07442e-32	postive
MEG3	PDGFRA	0.587832	1.36514e-36	postive
AC026401.3	BIRC5	0.479296	3.64629e-23	postive
CDC37L1-DT	LRP1	-0.414067	3.9264e-17	negative
PRKCQ-AS1	PRKCQ	0.827508	1.53638e-96	postive
AC026471.2	NOD1	-0.414421	3.66971e-17	negative
AC067838.1	ILK	-0.463516	1.38752e-21	negative
AC145423.2	ILK	-0.417991	1.84826e-17	negative
AC006206.2	NTF3	0.450215	2.58243e-20	postive
AC120053.1	ILK	-0.407698	1.30608e-16	negative
AC133552.5	SP1	-0.407268	1.41526e-16	negative
AC073046.1	SEM1	-0.613	1.76515e-40	negative
AL355802.2	ILK	-0.50457	7.13976e-26	negative
OSER1-DT	BCL3	-0.424725	4.9558e-18	negative
AC020916.2	TYK2	0.494296	9.58866e-25	postive
ADIRF-AS1	CASP3	-0.406012	1.78796e-16	negative
AC127496.2	PLXNB1	0.426486	3.49585e-18	postive
AL355488.1	GNRH1	0.494449	9.23231e-25	postive
AC008760.2	CIITA	0.474056	1.24675e-22	postive
AC073957.3	PLXNB1	0.638498	8.58095e-45	postive
AL136531.1	MSR1	-0.410035	8.42843e-17	negative
ACTA2-AS1	THBS1	0.706677	1.31335e-58	postive
AL358472.3	IKBKG	-0.411025	6.99402e-17	negative
AC007405.3	PDGFRB	-0.457723	5.03561e-21	negative
AC022509.1	BTC	0.427023	3.1412e-18	postive
VIM-AS1	VIM	0.426934	3.1978e-18	postive
LINC01355	PLXNB1	0.566323	1.58115e-33	postive
UNC5B-AS1	HSP90AB1	-0.421052	1.01974e-17	negative
SLC25A25-AS1	PLXNB1	0.521703	7.67812e-28	postive
UBXN10-AS1	LRP1	-0.406369	1.67301e-16	negative
ITGB2-AS1	ITGB2	0.596734	6.29536e-38	postive
AC073896.3	PLXNB1	0.481884	1.97131e-23	postive
AC006449.5	BCL3	-0.40006	5.33952e-16	negative
AL133367.1	PLXNB1	0.566644	1.42859e-33	postive
PRR34-AS1	PLCG1	-0.447303	4.81566e-20	negative
AC005076.1	SEM1	0.460633	2.64372e-21	postive
U62317.1	TYMP	0.626763	9.29822e-43	postive
AC012645.1	PPP4C	0.461353	2.25141e-21	postive
C10orf25	PLCG1	0.408753	1.07234e-16	postive
AL133346.1	CCN2	0.795886	3.58621e-84	postive
CYTOR	ACVR1B	-0.445614	6.89364e-20	negative
AC020913.3	NR2F6	0.401888	3.82476e-16	postive
MUC20-OT1	PLXNB1	0.46128	2.28863e-21	postive
INE1	LTB4R2	0.501483	1.57291e-25	postive
BOLA3-AS1	CD74	-0.404374	2.42147e-16	negative
AC084824.4	MSR1	-0.403753	2.7151e-16	negative
AC060780.1	HCST	-0.49302	1.31587e-24	negative
AL354863.1	TYMP	-0.403409	2.89267e-16	negative
LINC00853	PLCG1	-0.453115	1.38012e-20	negative
AC008554.1	HCST	-0.435413	5.77077e-19	negative
AP001453.2	ACVR1B	-0.474476	1.13062e-22	negative
LINC01637	TYMP	0.427677	2.75759e-18	postive
AC139887.1	FGFRL1	0.409883	8.67298e-17	postive
AP006621.2	PLXNB1	0.53936	5.44634e-30	postive
GABPB1-AS1	PLXNB1	0.463017	1.55185e-21	postive
LINC-PINT	NPR1	0.412286	5.5091e-17	postive
IGF2-AS	IGF2	0.798535	4.02123e-85	postive
RAB30-AS1	EED	0.556094	3.79241e-32	postive
LINC02449	TRPC4AP	0.425851	3.96595e-18	postive
AL133415.1	VIM	0.818325	1.05969e-92	postive
AC025857.2	CTSB	0.53966	4.99521e-30	postive
AC008610.1	ILK	-0.442121	1.43867e-19	negative
EMX2OS	FGF18	0.40503	2.14475e-16	postive
LINC00893	PLXNA3	0.53302	3.33002e-29	postive
ZNF793-AS1	IKBKG	-0.435658	5.48771e-19	negative
RUSC1-AS1	PLXNB1	0.566172	1.65868e-33	postive
AL031848.1	PLXNA3	0.446034	6.30678e-20	postive
ZNF436-AS1	PLXNB1	0.452304	1.64539e-20	postive
AC073569.2	SEM1	-0.456742	6.2489e-21	negative
AL118506.1	SEM1	-0.433475	8.57036e-19	negative
AC024075.3	NR2F6	0.55274	1.04984e-31	postive
AL356356.1	MC1R	0.441051	1.79904e-19	postive
AC091271.1	NOD1	-0.409475	9.36401e-17	negative
AC073896.4	ILK	-0.511271	1.25033e-26	negative
AC118754.1	FGFR3	0.45781	4.93984e-21	postive
PTOV1-AS1	IRF3	0.426207	3.69501e-18	postive
MIR600HG	PLXNB1	0.585254	3.26995e-36	postive
AL136295.7	IRF9	0.587767	1.39581e-36	postive
LINC01215	CCL20	0.578663	2.94434e-35	postive
AL360181.2	PLXNB1	0.539241	5.63648e-30	postive
AC105219.2	PLXNB1	0.4234	6.43633e-18	postive
AC100803.2	CD22	0.420565	1.12149e-17	postive
AC092794.1	KRAS	0.688714	1.34618e-54	postive
AC027348.1	CTSS	-0.448943	3.3931e-20	negative
AC022144.1	NFKBIB	0.459059	3.74863e-21	postive
AL354733.3	PLXNB1	0.511002	1.34185e-26	postive
